# Supplementary material for: Use, Abuse, and Misuse of Nasal Medications: Real-Life Survey on Community Pharmacist’s Perceptions
Source: MDPI journal article supplement (doi:10.3390/jpm13040579), 2023-03-26
Supplement: s1 [file s1]

## Supplement index

**Table S1:** Distribution over the Italian territory of the included pharmacies.

|                       | <i>n</i> | %    |
|-----------------------|----------|------|
| Nord                  | 152      | 40.4 |
| Nord-est              | 55       | 14.6 |
| Veneto                | 27       | 7.2  |
| Friuli-Venezia Giulia | 10       | 2.7  |
| Emilia-Romagna        | 9        | 2.4  |
| Trentino-Alto Adige   | 9        | 2.4  |
| Nord-ovest            | 97       | 25.8 |
| Piemonte              | 18       | 4.8  |
| Valle D'Aosta         | 1        | 0.3  |
| Liguria               | 16       | 4.3  |
| Lombardia             | 62       | 16,5 |
| Center                | 81       | 21.5 |
| Marche                | 8        | 2.1  |
| Toscana               | 6        | 1.6  |
| Umbria                | 1        | 0.3  |
| Lazio                 | 66       | 17.6 |
| Sud                   | 143      | 38.1 |
| Abruzzo               | 15       | 4.0  |
| Basilicata            | 3        | 0.8  |
| Molise                | 5        | 1.3  |
| Campania              | 21       | 5.6  |
| Puglia                | 22       | 5.9  |
| Calabria              | 24       | 6.4  |
| Islands               | 53       | 14.1 |
| Sardegna              | 37       | 9.8  |
| Sicilia               | 16       | 4.3  |
| Overall               | 376      | 100  |
